# Supplementary material
Source: ML conference proceedings conference paper supplement (https://openaccess.thecvf.com/content/CVPR2023/html/Chen_Unsupervised_Inference_of_CVPR_2023_paper.html)
Supplement: Supplementary file 1 [file Chen_Unsupervised_Inference_of_CVPR_2023_supplemental.zip]

Archive with 2 entries (2 files):
- CVPR2023_NeuralTPS_supp.pdf
- CVPR2023_NeuralTPs_supp.mp4
